# Supplementary material for: MiR-186 bidirectionally regulates cisplatin sensitivity of ovarian cancer cells via suppressing targets PIK3R3 and PTEN and upregulating APAF1 expression
Source: PubMed Central journal article supplement (PMC7150455; doi:10.7150/jca.41135), 2020-03-13
Supplement: jcav11p3446s1.pdf [file jcav11p3446s1.pdf]

**Table S1** The sequences of primers used in quantitative real-time PCR

| Primers            | Sequences                       |
|--------------------|---------------------------------|
| miR-186-sense      | 5'-CCGGCAAAGAATTCTCCT-3'        |
| miR-186-anti-sense | 5'-AGTGCGTGTTCGTGGAGT-3'        |
| U6-sense           | 5'-GCTTCGGCAGCACATATACTAAAAT-3' |
| U6-antisense       | 5'-CGCTTCACGAATTTGCGTGTCAT-3'   |
